# Supplementary material for: Mires in Europe—Regional Diversity, Condition and Protection
Source: MDPI journal article supplement (doi:10.3390/d13080381), 2021-08-16
Supplement: s1 [file s1]

## Supplementary Materials

Table S1: Main occurrences of ombrotrophic (grey) and minerotrophic (white) hydromorphic mire massif types in the various mire regions of Europe (from [27]). C = characteristic type, x = additional.

| Mire type                                              | Percolation bog | Rim raised bog | Sloping fen | String-flark fen and mixed mire | Palsa mire | Tundra seepage & polygon mire | Blanket bog | Atlantic raised bog | Typical raised bog | Wooded raised bog | Plane bog | Percolation fen | Flat fen & marsh |
|--------------------------------------------------------|-----------------|----------------|-------------|---------------------------------|------------|-------------------------------|-------------|---------------------|--------------------|-------------------|-----------|-----------------|------------------|
| Mire region                                            |                 |                |             |                                 |            |                               |             |                     |                    |                   |           |                 |                  |
| Colchis mire region                                    | C               |                |             |                                 |            |                               |             |                     |                    |                   |           |                 | x                |
| Northern fen region                                    |                 | x              | C           | C                               |            |                               | x           |                     |                    |                   | x         | x               | x                |
| Palsa mire region                                      |                 |                |             | x                               | C          |                               |             |                     |                    |                   |           |                 | x                |
| Arctic seepage and polygon mire region                 |                 |                |             |                                 | x          | C                             |             |                     |                    |                   |           |                 | x                |
| Atlantic bog region                                    |                 |                |             |                                 |            |                               | C           | C                   |                    |                   | x         |                 | x                |
| Typical raised bog region                              |                 |                |             |                                 |            |                               |             |                     | C                  | C                 | x         |                 | x                |
| Continental fen and bog region                         |                 |                |             |                                 |            |                               |             |                     |                    | C                 | x         | x               | x                |
| Nemoral-sub-meridional fen region                      |                 |                |             |                                 |            |                               |             |                     |                    |                   | x         | x               | C                |
| Southern European marsh region                         |                 |                |             |                                 |            |                               |             |                     |                    |                   |           |                 | C                |
| Central and southern European mountain compound region |                 |                | x           |                                 |            |                               |             |                     |                    |                   | x         | x               | C                |

**Table S2.** List of CORINE land cover classes regarded as indicating peatland degradation. There are more classes containing degraded peatlands, but not exclusively and in unknown proportion to the peatland areas contained that are not degraded.

| Code                   | Name                                                                                  |
|------------------------|---------------------------------------------------------------------------------------|
| 1,230,000,077,255, 111 | Continuous urban fabric                                                               |
| 2,255,000,000,255, 112 | Discontinuous urban fabric                                                            |
| 3,204,077,242,255, 121 | Industrial or commercial units                                                        |
| 4,204,000,000,255, 122 | Road and rail networks and associated land                                            |
| 5,230,204,204,255, 123 | Port areas                                                                            |
| 6,230,204,230,255, 124 | Airports                                                                              |
| 7,166,000,204,255, 131 | Mineral extraction sites                                                              |
| 8,166,077,000,255, 132 | Dump sites                                                                            |
| 9,255,077,255, 255,133 | Construction sites                                                                    |
| 10,255,166,255,255,141 | Green urban areas                                                                     |
| 11,255,230,255,255,142 | Sport and leisure facilities                                                          |
| 12,255,255,168,255,211 | Non-irrigated arable land                                                             |
| 13,255,255,000,255,212 | Permanently irrigated land                                                            |
| 14,230,230,000,255,213 | Rice fields                                                                           |
| 15,230,128,000,255,221 | Vineyards                                                                             |
| 16,242,166,077,255,222 | Fruit trees and berry plantations                                                     |
| 17,230,166,000,255,223 | Olive groves                                                                          |
| 18,230,230,077,255,231 | Pastures                                                                              |
| 19,255,230,166,255,241 | Annual crops associated with permanent crops                                          |
| 20,255,230,077,255,242 | Complex cultivation patterns                                                          |
| 21,230,204,077,255,243 | Land principally occupied by agriculture with significant areas of natural vegetation |
| 22,242,204,166,255,244 | Agro-forestry areas                                                                   |

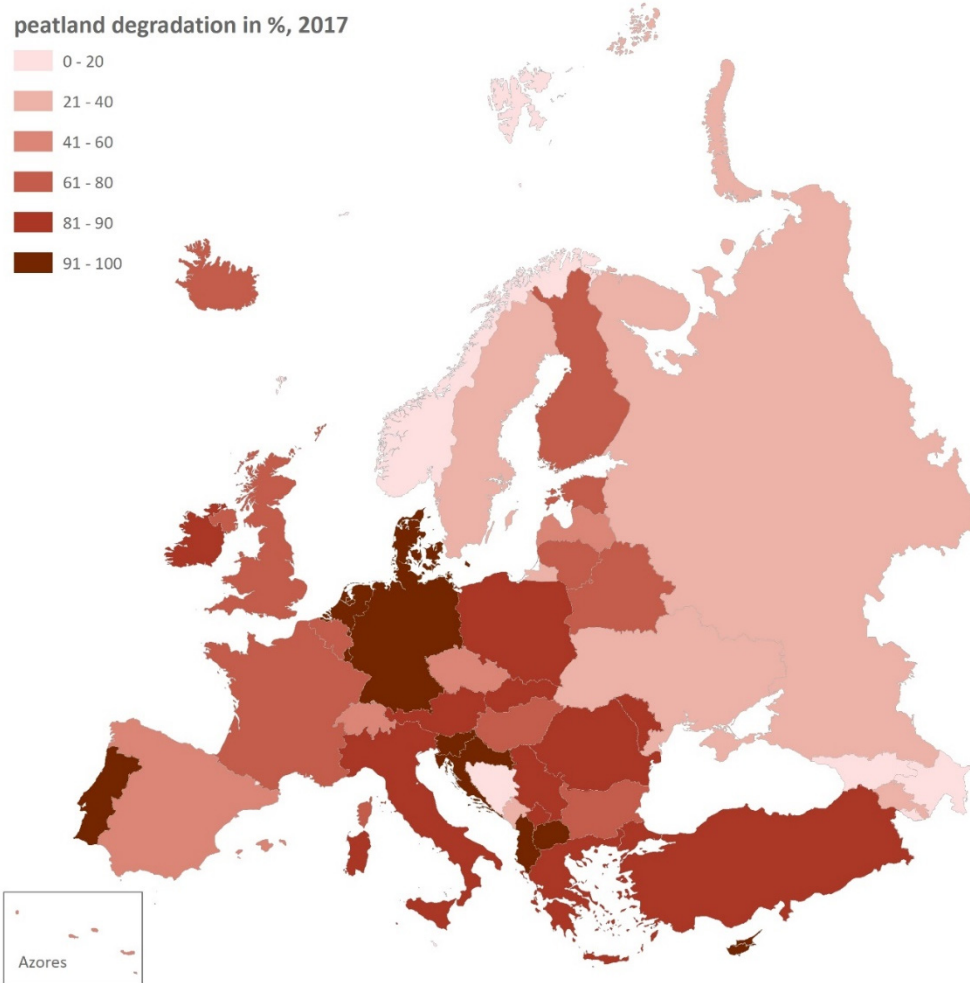

**Figure S1.** Proportion (%) of degraded peatlands per country (from [18]). For Finland, Norway, Sweden, and European Russia, we assumed higher degradation in southern mire regions. Finland: (II) 25%, (III) 55%, (IV) 70%, (VII) 75%; Norway (II) 10%, (III) 14%, (IV) 17%, V 35%; Sweden (II) 15%, (III) 20%, (IV) 25%, (V) 35%, (VII) 40%; Russia (I) 1%, (II) 5%, (III) 5%, (IV) 20%, (VI) 30%, (IX) 60%.

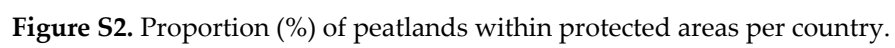

**Figure S2.** Proportion (%) of peatlands within protected areas per country.
